# Supplementary material for: The endonuclease EEPD1 mediates synthetic lethality in RAD52-depleted BRCA1 mutant breast cancer cells
Source: Springer Nature journal article supplement (doi:10.1186/s13058-017-0912-8), 2017-11-16

# S Fig. 1

**A** MDA-MB-436 BRCA1+

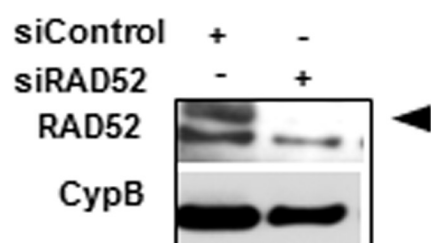

**B** MDA-MB-436 BRCA1+

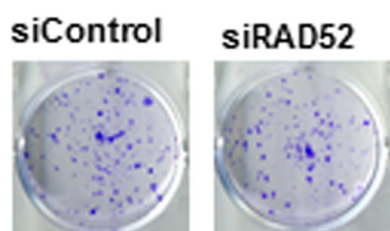

**D** MDA-MB-436 BRCA1+

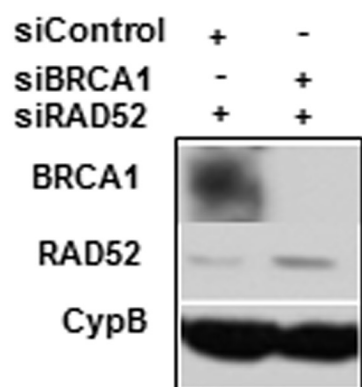

**E** MDA-MB-436 BRCA1+

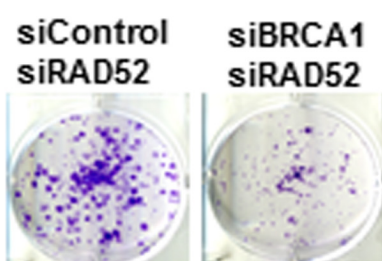

**C** MDA-MB-436 BRCA1+

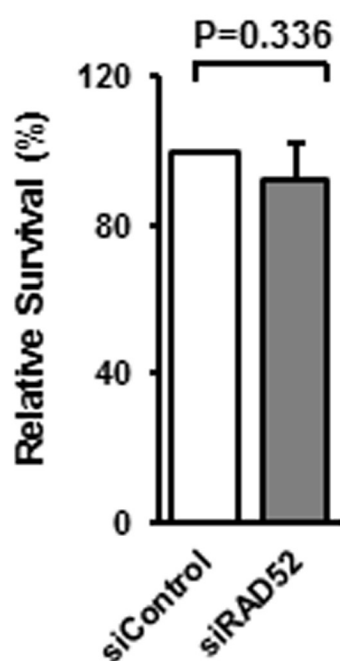

**F** MDA-MB-436 BRCA1+

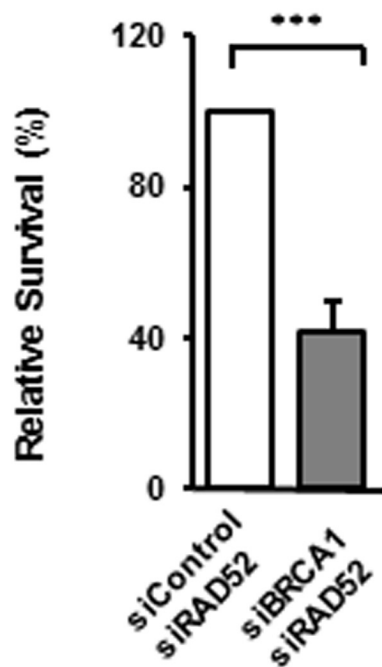

Supplement: MOESM1 [file 15231070]
