# Supplementary material for: The endonuclease EEPD1 mediates synthetic lethality in RAD52-depleted BRCA1 mutant breast cancer cells
Source: Springer Nature journal article supplement (doi:10.1186/s13058-017-0912-8), 2017-11-16

# S Fig. 3

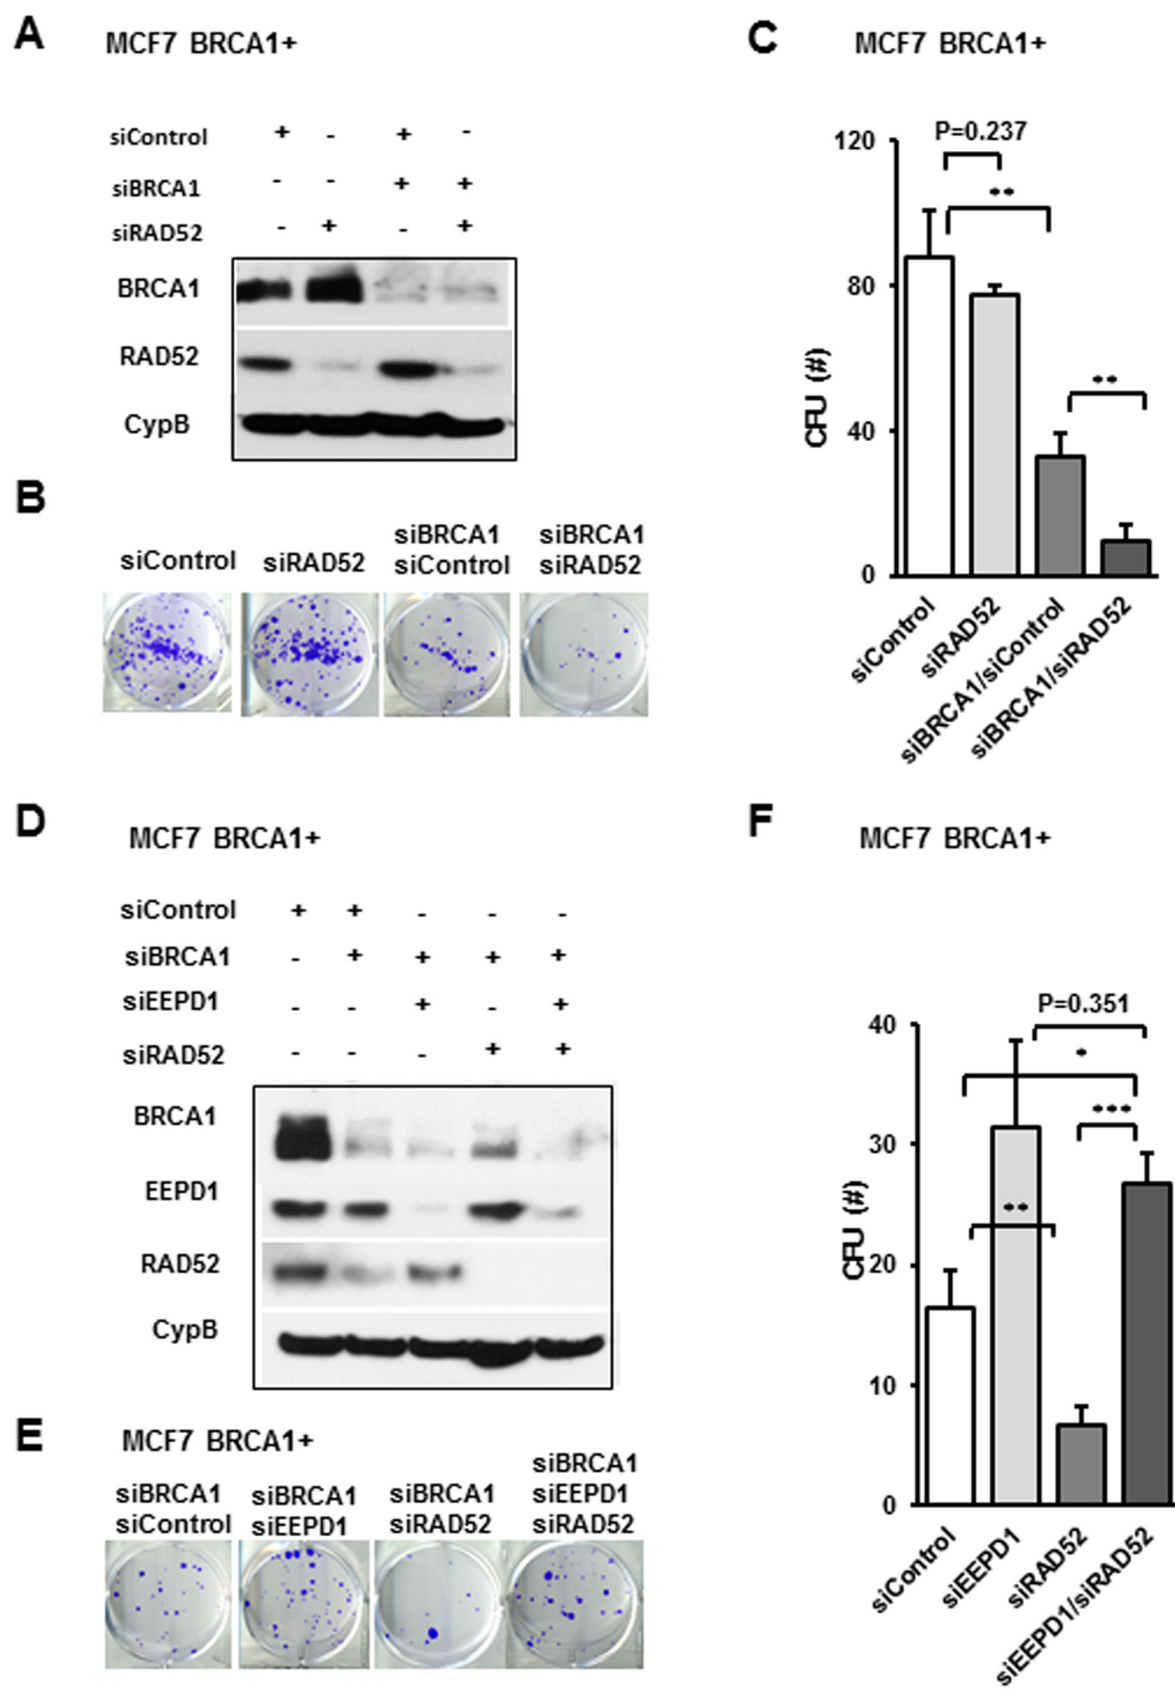

Supplement: MOESM3 [file 15231070]
