# Supplementary material for: The endonuclease EEPD1 mediates synthetic lethality in RAD52-depleted BRCA1 mutant breast cancer cells
Source: Springer Nature journal article supplement (doi:10.1186/s13058-017-0912-8), 2017-11-16

# S Fig. 5

**A** MDA-MB0436 BRCA1<sup>-/-</sup>

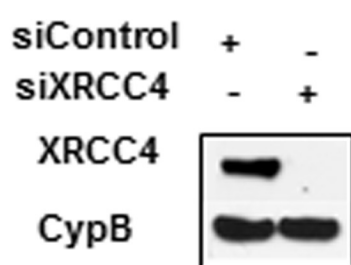

**B** MDA-MB0436 BRCA1<sup>-/-</sup>

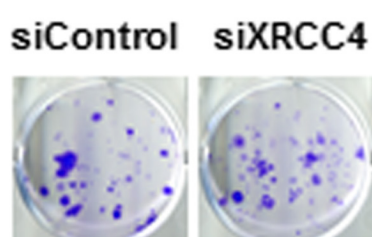

**C** MDA-MB0436 BRCA1<sup>-/-</sup>

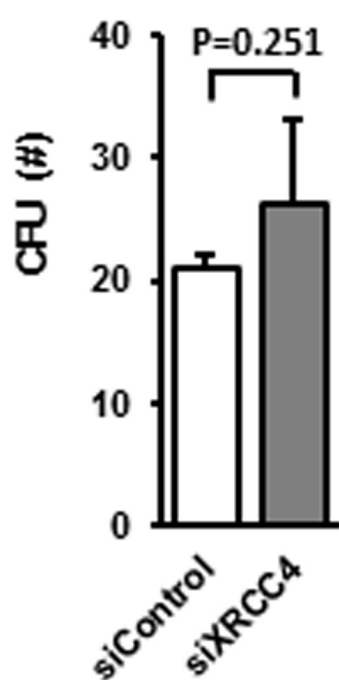

**D** MDA-MB0436 BRCA1<sup>-/-</sup>

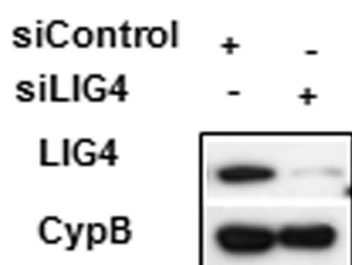

**E** MDA-MB0436 BRCA1<sup>-/-</sup>

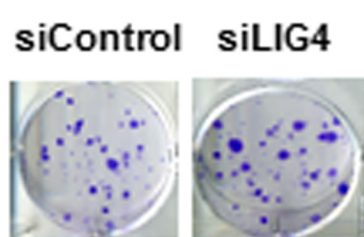

**F** MDA-MB0436 BRCA1<sup>-/-</sup>

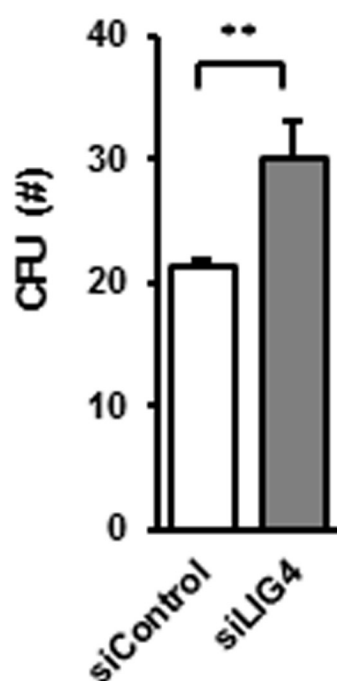

**G** MDA-MB0436 BRCA1<sup>-/-</sup>

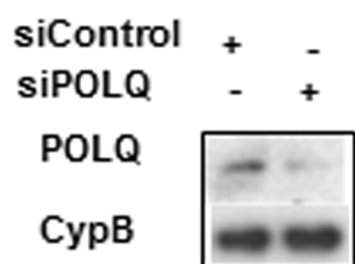

**H** MDA-MB0436 BRCA1<sup>-/-</sup>

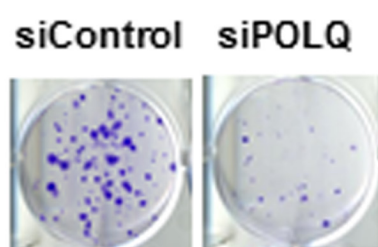

**I** MDA-MB0436 BRCA1<sup>-/-</sup>

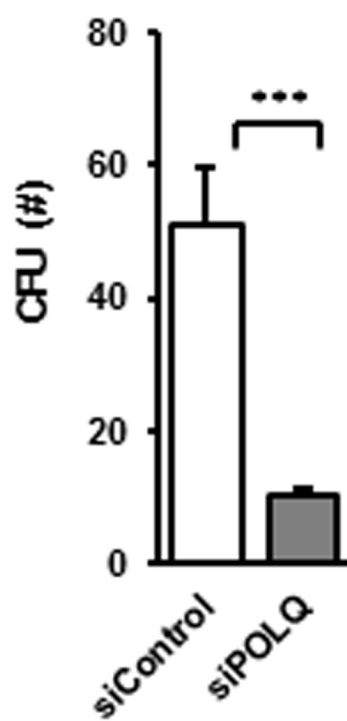

Supplement: MOESM5 [file 15231070]
